# Supplementary material for: Exploring machine learning strategies for predicting cardiovascular disease risk factors from multi-omic data
Source: Springer Nature journal article supplement (doi:10.1186/s12911-024-02521-3), 2024-05-02
Supplement: 12911_2024_2521_MOESM1_ESM.pdf [file 12911_2024_2521_MOESM1_ESM.pdf]

---

# Supplementary document

*Drouard et al.*

last update: January 2023

---

ML-specific F1 performance for the target variables DBP, EERATIO, EARATIO and LAVI

# DBP

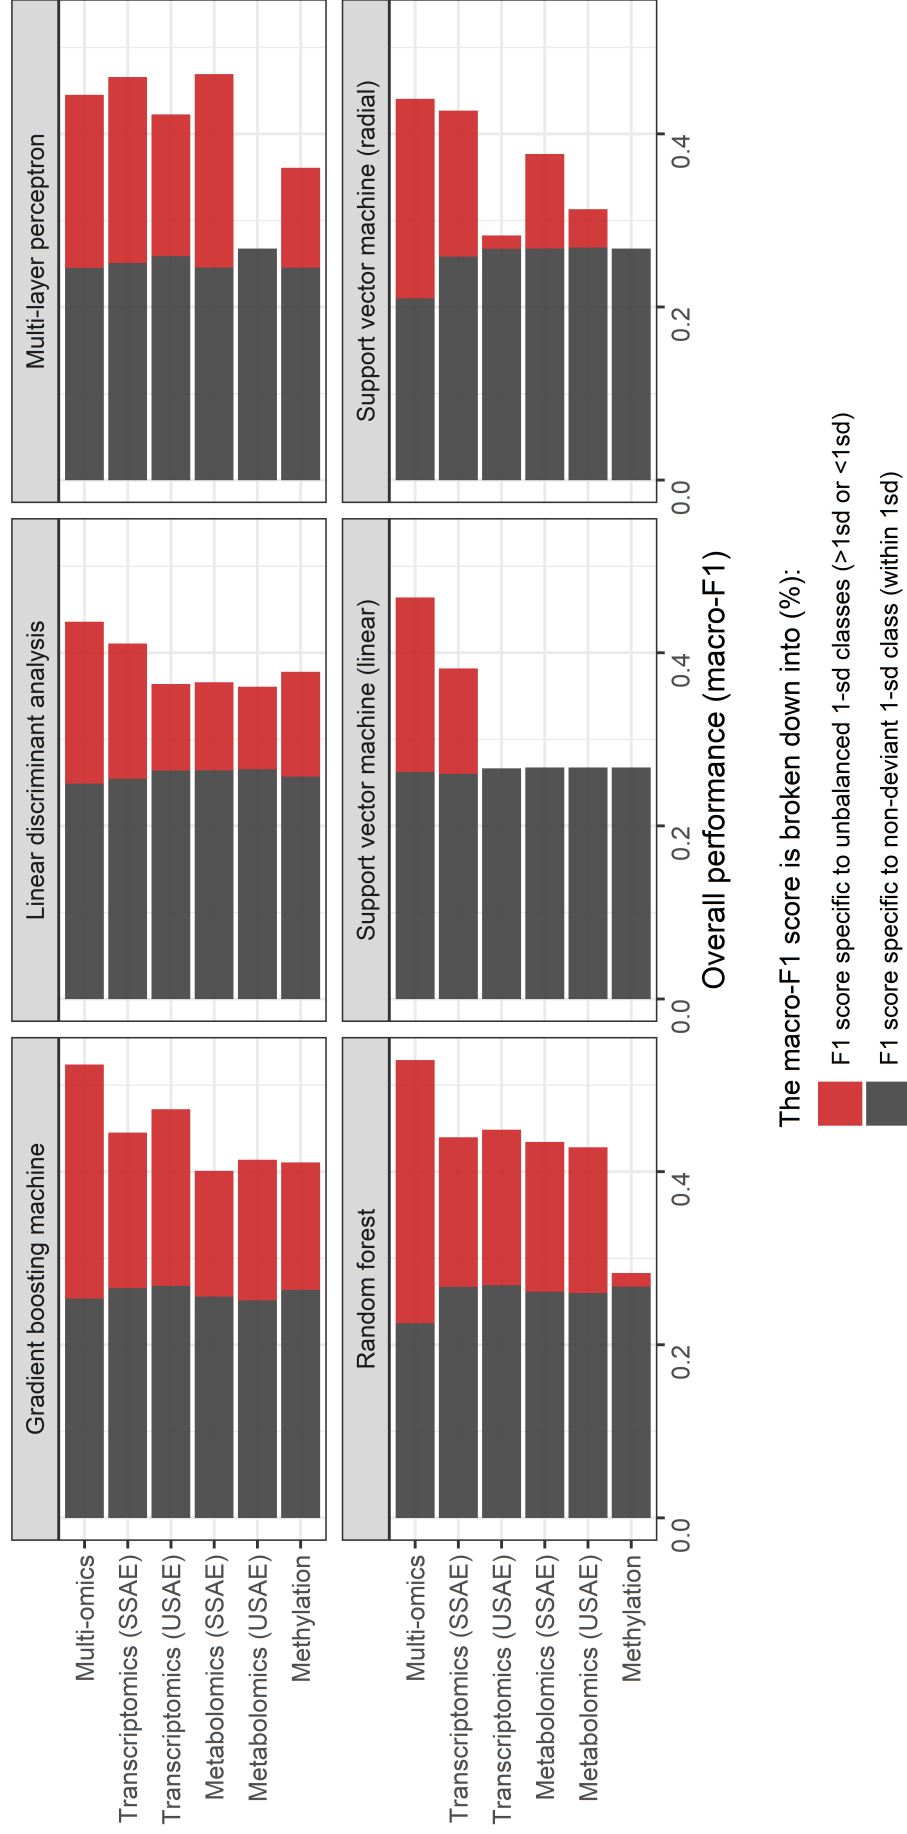

Figure S1: multi-method (cross-)omics performance for DBP prediction.

# E/e' ratio

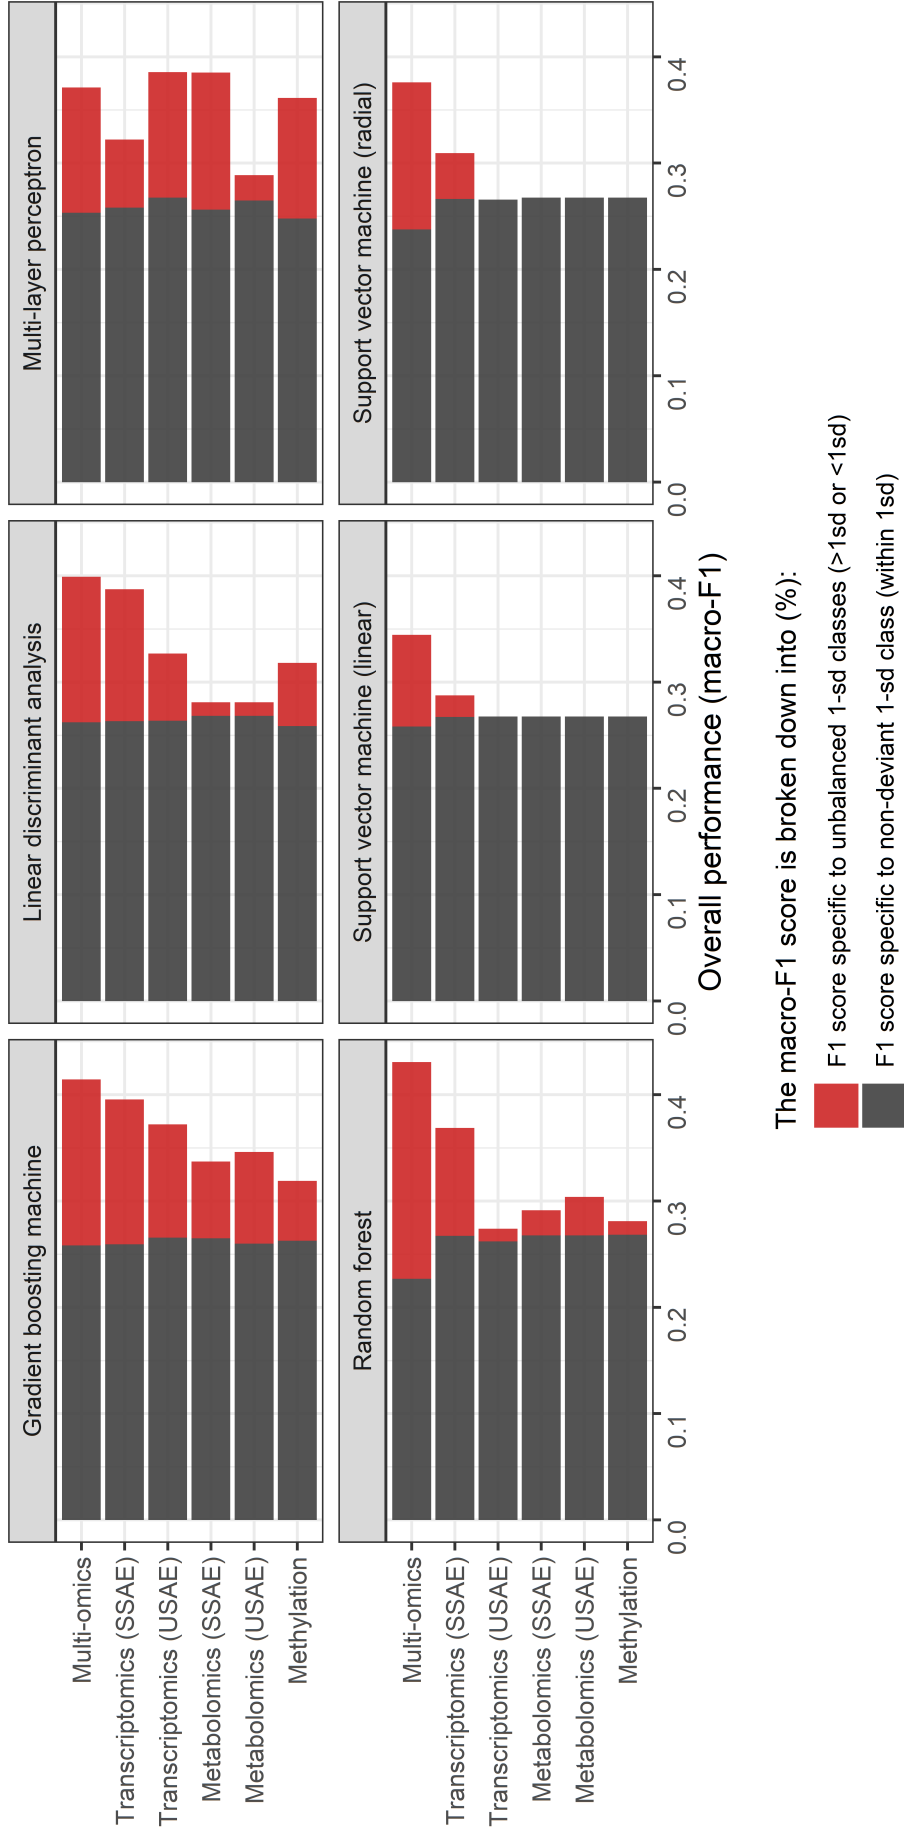

Figure S2: multi-method (cross-)omics performance for E/e' ratio prediction.

# E/A ratio

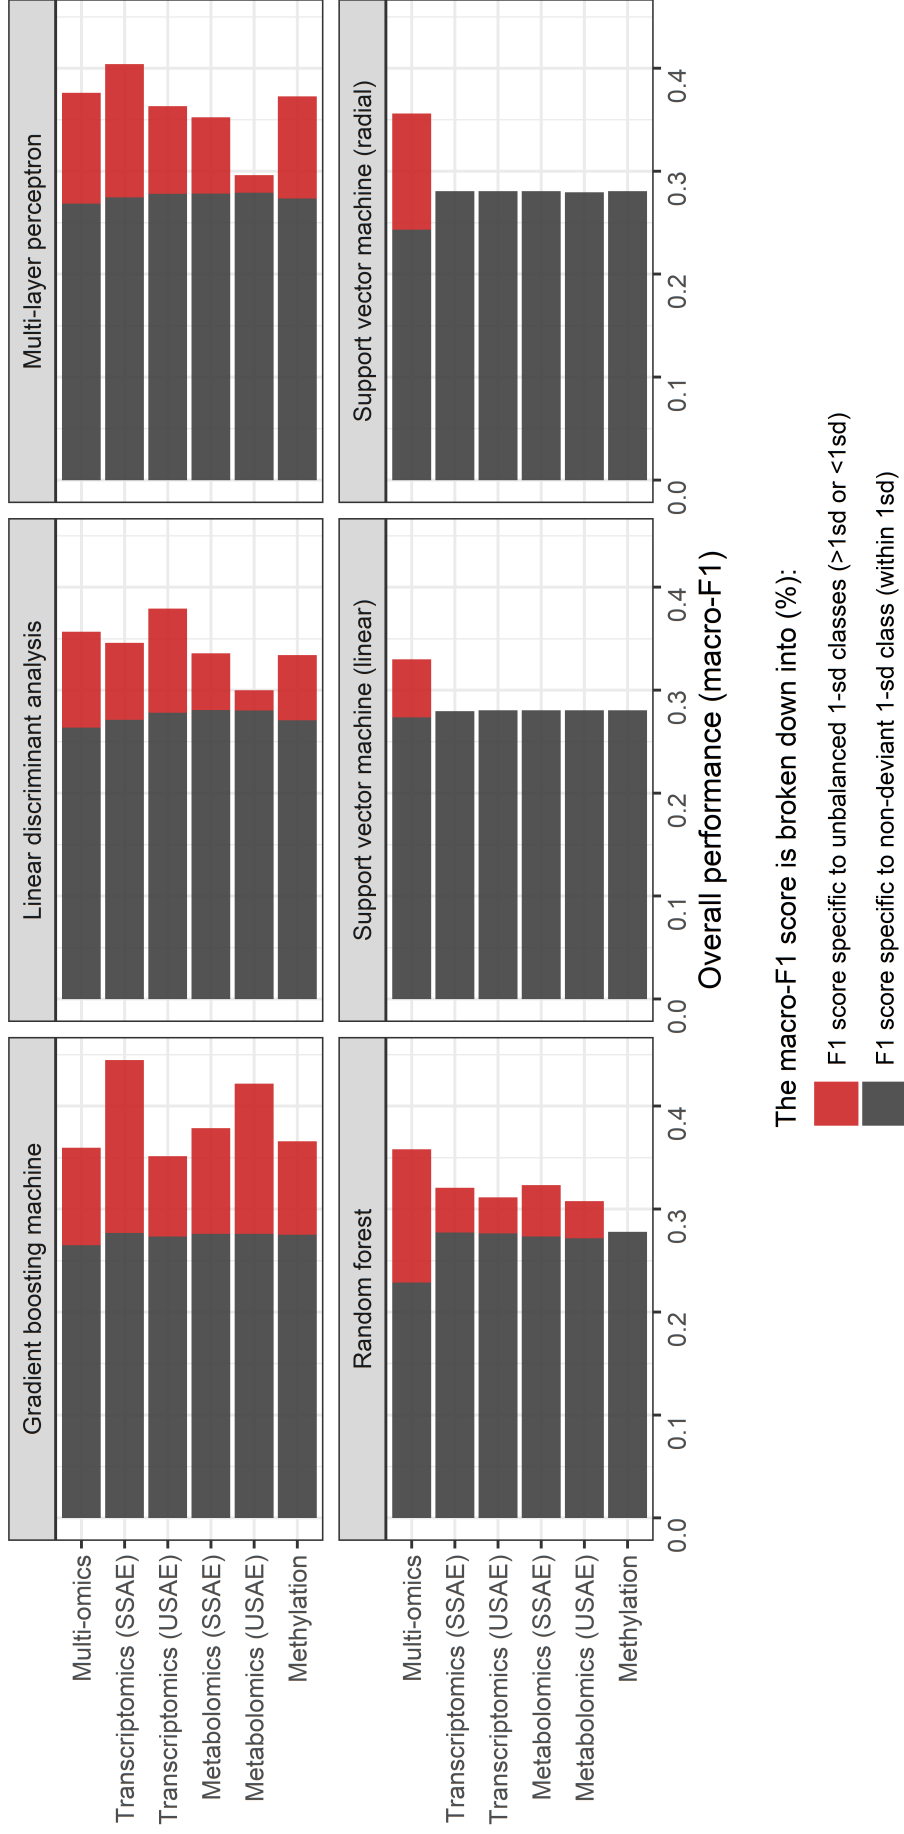

Figure S3: multi-method (cross-)omics performance for E/A ratio prediction.

# LAVI

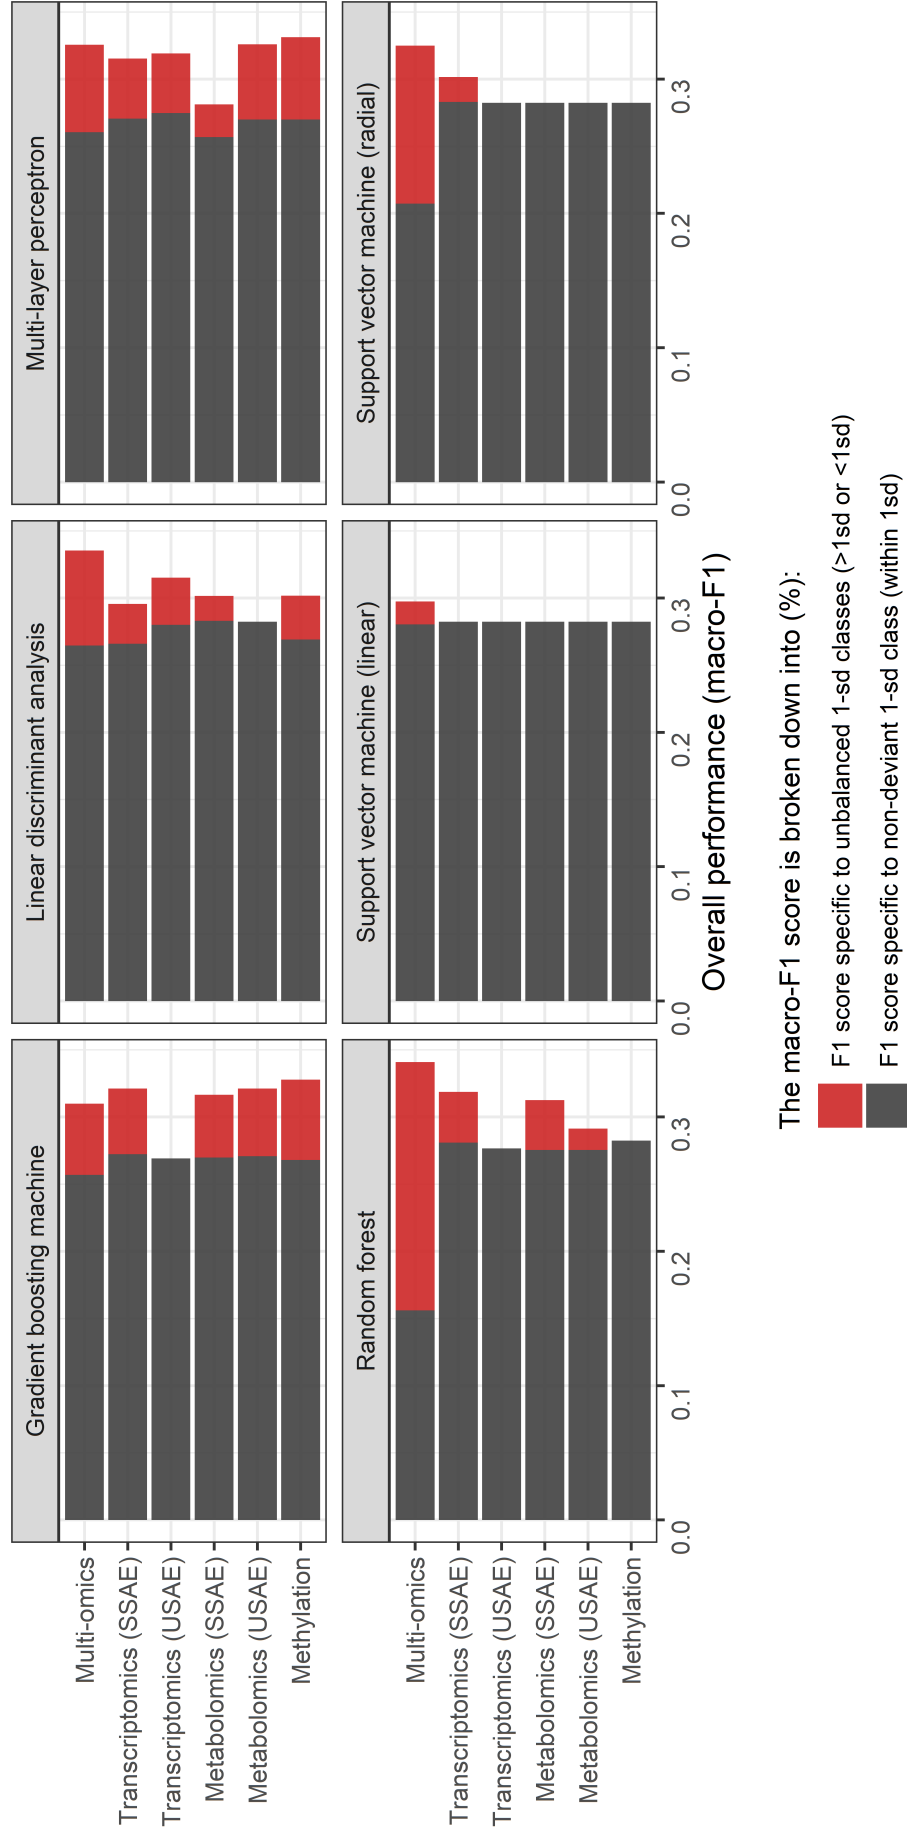

Figure S4: multi-method (cross-)omics performance for LAVI prediction.
